# Supplementary material
Source: HighWire-hosted journal article supplement (https://jitc.bmj.com/content/13/5/e010638)
Supplement: inline-supplementary-material-1 [file inline-supplementary-material-1.pdf]

**Table S1.** Drugs trialed before initiation of dupilumab therapy.

| Drug category               | Drugs administered before initiation of dupilumab therapy for managing cutaneous immune-related adverse events                                                                                                                                                                                                                                                                                                                                                                                      |
|-----------------------------|-----------------------------------------------------------------------------------------------------------------------------------------------------------------------------------------------------------------------------------------------------------------------------------------------------------------------------------------------------------------------------------------------------------------------------------------------------------------------------------------------------|
| Topical treatment           | Betamethasone, clobetasol, triamcinolone, fluocinonide, dexamethasone swish and spit, magic mouth wash, nystatin rinse, lidocaine rinse, doxycycline swish and spit, mometasone, clobetasol solution, hydrocortisone, fluocinolone, econazole, calcipotriene, vitamin E, niacinamide, clindamycin gel, mupirocin, topical pimecrolimus, topical tacrolimus, silver sulfadiazine cream, Sarna, Aquaphor, CBD:THC Wonderbalm, camphor/menthol, Curel cream, CeraVe anti-itch cream, Eucerin, Vaseline |
| Hemorrhagic agents          | Pentoxifylline                                                                                                                                                                                                                                                                                                                                                                                                                                                                                      |
| Oral vitamin                | Nicotinamide                                                                                                                                                                                                                                                                                                                                                                                                                                                                                        |
| Opioid antagonist           | Naltrexone                                                                                                                                                                                                                                                                                                                                                                                                                                                                                          |
| Oral systemic non-steroidal | Methotrexate, apremilast, mycophenolic acid                                                                                                                                                                                                                                                                                                                                                                                                                                                         |
| Anticonvulsants             | Gabapentin, pregabalin                                                                                                                                                                                                                                                                                                                                                                                                                                                                              |
| Oral antibiotics            | Doxycycline, cefalexin, dapsone                                                                                                                                                                                                                                                                                                                                                                                                                                                                     |
| Glucocorticoids             | Prednisone, oral dexamethasone, intravenous methylprednisolone                                                                                                                                                                                                                                                                                                                                                                                                                                      |
| Antihistamines              | Diphenhydramine, cetirizine, hydroxyzine, fexofenadine, famotidine, loratadine                                                                                                                                                                                                                                                                                                                                                                                                                      |
| Biologics                   | Rituximab, omalizumab                                                                                                                                                                                                                                                                                                                                                                                                                                                                               |
| Phototherapy                | Narrow band ultraviolet B                                                                                                                                                                                                                                                                                                                                                                                                                                                                           |
| Immunoglobulin              | Intravenous immunoglobulin                                                                                                                                                                                                                                                                                                                                                                                                                                                                          |
| Oral retinoid               | Acetretin                                                                                                                                                                                                                                                                                                                                                                                                                                                                                           |

**Table S2.** Time from ICB start to the first cirAE.

| ICB to the first cirAE                       | Case<br>Median [Q1, Q3]      | Control 1<br>Median [Q1, Q3] |
|----------------------------------------------|------------------------------|------------------------------|
| Lichenoid dermatitis, maculopapular eruption | 9 [9, 9] (one patient)       | N/A (no patient)             |
| Maculopapular eruption                       | 14.5 [10.5, 38.5]            | 21 [12.5, 80]                |
| Eczematous dermatitis                        | 21 [9, 45.5]                 | 98 [18, 199.5]               |
| Rash, NOS                                    | 59.5 [50.5, 206.3]           | 53 [21, 146]                 |
| Pruritus                                     | 83 [55.3, 129.8]             | 34 [21, 152.8]               |
| Lichenoid dermatitis                         | 165 [132, 202]               | 156 [42.5, 215.5]            |
| Bullous pemphigoid                           | 211 [113.8, 496.8]           | 394 [253, 437.5]             |
| Radiation induced morphea ICB exacerbated    | 310 [310, 310] (one patient) | N/A                          |
| Lichenoid dermatitis, eczematous dermatitis  | 924 [924, 924] (one patient) | N/A                          |
| Psoriasiform eruption                        | N/A                          | 64.5 [38, 123.3]             |
| Vitiligo                                     | N/A                          | 285 [165.5, 553]             |

CirAE: Cutaneous immune-related adverse event; NOS: Not otherwise specified; CBC: Complete blood count; Q1: the first quartile; Q3: the third quartile. N/A: not applicable.

**Table S3.** Response to dupilumab stratified by morphology of cutaneous immune-related adverse events.

|           | Total<br>(N=53)                                            | Eczematous<br>dermatitis<br>(N=22)                            | Bullous<br>pemphigoid<br>(N=14)                                    | Lichenoid<br>dermatitis<br>(N=7)                         | Maculopapular<br>eruption<br>(N=5)                          |
|-----------|------------------------------------------------------------|---------------------------------------------------------------|--------------------------------------------------------------------|----------------------------------------------------------|-------------------------------------------------------------|
| Responder |                                                            |                                                               |                                                                    |                                                          |                                                             |
| Complete  | 33 (62.3%)                                                 | 14 (63.6%)                                                    | 8 (57.1%)                                                          | 3 (42.9%)                                                | 4 (80.0%)                                                   |
| Partial   | 14 (26.4%)                                                 | 5 (22.7%)                                                     | 3 (21.4%)                                                          | 4 (57.1%)                                                | 1 (20.0%)                                                   |
| No        | 6 (11.3%)                                                  | 3 (13.6%)                                                     | 3 (21.4%)                                                          | 0 (0%)                                                   | 0 (0%)                                                      |
|           |                                                            |                                                               |                                                                    |                                                          |                                                             |
|           | Lichenoid<br>dermatitis,<br>Bullous<br>pemphigoid<br>(N=1) | Lichenoid<br>dermatitis,<br>eczematous<br>dermatitis<br>(N=1) | Lichenoid<br>dermatitis,<br>morbilliform drug<br>eruption<br>(N=1) | Radiation<br>induced morphea<br>ICB exacerbated<br>(N=1) | Sclerodermoid<br>reaction with<br>morphea-profunda<br>(N=1) |
| Responder |                                                            |                                                               |                                                                    |                                                          |                                                             |
| Complete  | 1 (100%)                                                   | 1 (100%)                                                      | 1 (100%)                                                           | 0 (0%)                                                   | 1 (100%)                                                    |
| Partial   | 0 (0%)                                                     | 0 (0%)                                                        | 0 (0%)                                                             | 1 (100%)                                                 | 0 (0%)                                                      |
| No        | 0 (0%)                                                     | 0 (0%)                                                        | 0 (0%)                                                             | 0 (0%)                                                   | 0 (0%)                                                      |

**Table S4.** Time-varying Cox proportional hazards models for overall survival with ICB interruption

|                               | Comparison 1 |            |         | Comparison 2 |            |         |
|-------------------------------|--------------|------------|---------|--------------|------------|---------|
|                               | HR           | 95% CI     | p-value | HR           | 95% CI     | p-value |
| Dupilumab                     | 0.69         | 0.32, 1.49 | 0.3     | 0.73         | 0.34, 1.58 | 0.4     |
| Systemic glucocorticoid       | 2.02         | 1.02, 3.98 | 0.043   | 1.68         | 0.93, 3.04 | 0.085   |
| Age at ICB initiation         | 1.03         | 1, 1.07    | 0.066   | 1.01         | 0.98, 1.04 | 0.5     |
| CCS                           | 1.1          | 0.96, 1.27 | 0.2     | 1.19         | 1.07, 1.32 | 0.002   |
| Cancer stage at ICB           |              |            |         |              |            |         |
| IV                            | —            | —          |         | —            | —          |         |
| III and other                 | 0.73         | 0.35, 1.53 | 0.4     | 0.78         | 0.4, 1.53  | 0.5     |
| Cancer type                   |              |            |         |              |            |         |
| Melanoma                      | —            | —          |         | —            | —          |         |
| Genitourinary                 | 2.5          | 1.1, 5.66  | 0.028   | 1.26         | 0.53, 2.99 | 0.6     |
| Head and neck                 | 1.94         | 0.68, 5.51 | 0.2     | 2.97         | 1.22, 7.24 | 0.017   |
| Thoracic                      | 1.57         | 0.59, 4.16 | 0.4     | 2.04         | 0.81, 5.15 | 0.13    |
| Other                         | 2.46         | 0.72, 8.45 | 0.2     | 2.9          | 1.15, 7.29 | 0.023   |
| ICB type                      |              |            |         |              |            |         |
| Combination                   | —            | —          |         | —            | —          |         |
| PD-1/PD-L1                    | 0.98         | 0.47, 2.07 | >0.9    | 0.74         | 0.41, 1.32 | 0.3     |
| ICB interruption <sup>c</sup> |              |            |         |              |            |         |
| Continuation                  | —            | —          |         | —            | —          |         |
| Discontinuation               | 1.61         | 0.63, 4.16 | 0.3     | 2.24         | 1.25, 4    | 0.006   |
| Pause                         | 0.32         | 0.07, 1.5  | 0.15    | 0.39         | 0.05, 3.01 | 0.4     |
| Race                          |              |            |         |              |            |         |
| White                         | —            | —          |         | —            | —          |         |
| Other                         | 1.46         | 0.57, 3.73 | 0.4     | 1.78         | 0.7, 4.5   | 0.2     |
| Sex                           |              |            |         |              |            |         |
| Female                        | —            | —          |         | —            | —          |         |
| Male                          | 0.59         | 0.31, 1.11 | 0.1     | 1.18         | 0.65, 2.15 | 0.6     |

<sup>a</sup> Comparison 1: comparison between the dupilumab group and the control 1 group.  
<sup>b</sup> Comparison 2: comparison between the dupilumab group and the control 2 group.  
<sup>c</sup> ICB interruption: "discontinuation" if a patient received less than 3 cycles of treatment, "pause" if a patient missed or delayed at least two cycles (two instances of more than 42 days in between successive cycles) within one year after ICB initiation, and "continuation" otherwise.

HR: Hazard Ratio; CI: Confidence Interval; CCS: Charlson Comorbidity Score; PD-1: Programmed Death-1; PD-L1: Programmed Death-Ligand 1

**Table S5.** Time-varying Cox proportional hazards models for overall survival with ICB duration.

|                         | Comparison 1 |            |         |  | Comparison 2 |            |         |
|-------------------------|--------------|------------|---------|--|--------------|------------|---------|
|                         | HR           | 95% CI     | p-value |  | HR           | 95% CI     | p-value |
| Dupilumab               | 0.65         | 0.3, 1.38  | 0.3     |  | 0.57         | 0.26, 1.24 | 0.2     |
| Systemic glucocorticoid | 1.82         | 0.94, 3.53 | 0.074   |  | 1.37         | 0.81, 2.31 | 0.2     |
| ICB duration status     | 0.02         | 0, 0.18    | <0.001  |  | 0.01         | 0, 0.08    | <0.001  |
| Age at ICB initiation   | 1.02         | 0.99, 1.06 | 0.13    |  | 1.01         | 0.98, 1.04 | 0.6     |
| CCS                     | 1.24         | 1.07, 1.44 | 0.004   |  | 1.17         | 1.05, 1.31 | 0.004   |
| Cancer stage at ICB     |              |            |         |  |              |            |         |
| IV                      | —            | —          |         |  | —            | —          |         |
| III and other           | 0.55         | 0.26, 1.16 | 0.12    |  | 0.7          | 0.36, 1.35 | 0.3     |
| Cancer type             |              |            |         |  |              |            |         |
| Melanoma                | —            | —          |         |  | —            | —          |         |
| Genitourinary           | 1.57         | 0.69, 3.55 | 0.3     |  | 1.17         | 0.5, 2.76  | 0.7     |
| Head and neck           | 2.69         | 0.93, 7.81 | 0.069   |  | 3.49         | 1.41, 8.64 | 0.007   |
| Thoracic                | 1.89         | 0.74, 4.81 | 0.2     |  | 1.94         | 0.78, 4.88 | 0.2     |
| Other                   | 2.28         | 0.68, 7.63 | 0.2     |  | 2.96         | 1.23, 7.15 | 0.016   |
| ICB type                |              |            |         |  |              |            |         |
| Combination             | —            | —          |         |  | —            | —          |         |
| PD-1/PD-L1              | 1.11         | 0.54, 2.29 | 0.8     |  | 0.78         | 0.44, 1.33 | 0.4     |
| Race                    |              |            |         |  |              |            |         |
| White                   | —            | —          |         |  | —            | —          |         |
| Other                   | 2.08         | 0.86, 5.02 | 0.1     |  | 2            | 0.8, 5     | 0.14    |
| Sex                     |              |            |         |  |              |            |         |
| Female                  | —            | —          |         |  | —            | —          |         |
| Male                    | 0.62         | 0.33, 1.15 | 0.13    |  | 1.34         | 0.73, 2.43 | 0.3     |

<sup>a</sup> Comparison 1: comparison between the dupilumab group and the control 1 group.  
<sup>b</sup> Comparison 2: comparison between the dupilumab group and the control 2 group.  
<sup>c</sup> ICB duration status is a time-varying variable: "1" during the ICB treatment and "0" between ICB end to the date of death or the last follow-up.

HR: Hazard Ratio; CI: Confidence Interval; CCS: Charlson Comorbidity Score; PD-1: Programmed Death-1; PD-L1: Programmed Death-Ligand 1

**Table S6.** List of other irAEs treated with systemic immunosuppression.

|                                                   | <b>Dupilumab (10)</b> | <b>Control 1 (42)</b> | <b>Control 2 (28)</b> |
|---------------------------------------------------|-----------------------|-----------------------|-----------------------|
| Colitis                                           | 2                     | 11                    | 5                     |
| Pneumonitis                                       | 1                     | 5                     | 2                     |
| Arthritis                                         | 0                     | 8                     | 10                    |
| Hepatitis                                         | 0                     | 4                     | 2                     |
| Pancreatitis                                      | 2                     | 0                     | 1                     |
| Adrenal insufficiency                             | 3                     | 0                     | 0                     |
| Hypophysitis                                      | 0                     | 3                     | 0                     |
| Nephritis                                         | 0                     | 1                     | 2                     |
| Encephalitis                                      | 0                     | 0                     | 2                     |
| Myocarditis                                       | 0                     | 1                     | 1                     |
| Uveitis                                           | 1                     | 0                     | 0                     |
| Thyroiditis                                       | 0                     | 1                     | 0                     |
| Hepatitis/Myositis/Myocarditis                    | 1                     | 0                     | 0                     |
| Enteritis                                         | 0                     | 1                     | 0                     |
| Proctitis                                         | 0                     | 1                     | 0                     |
| Gastritis                                         | 0                     | 1                     | 0                     |
| Pancytopenia                                      | 0                     | 0                     | 1                     |
| ICB Induced flare of prior Polymyalgia rheumatica | 0                     | 1                     | 0                     |
| ICB Induced Flare of Prior Ulcerative colitis     | 0                     | 1                     | 0                     |
| Pneumonitis/Colitis                               | 0                     | 1                     | 0                     |
| Encephalitis/Hypophysitis                         | 0                     | 1                     | 0                     |
| Pneumonitis/Nephritis                             | 0                     | 1                     | 0                     |
| Colitis/Gastritis                                 | 0                     | 0                     | 1                     |
| Hepatitis/Pancreatitis                            | 0                     | 0                     | 1                     |
